# Supplementary material for: Using Machine Learning Methods Combined with Vegetation Indices and Growth Indicators to Predict Seed Yield of Bromus inermis
Source: MDPI journal article supplement (doi:10.3390/plants13060773), 2024-03-08
Supplement: s1 [file s1]

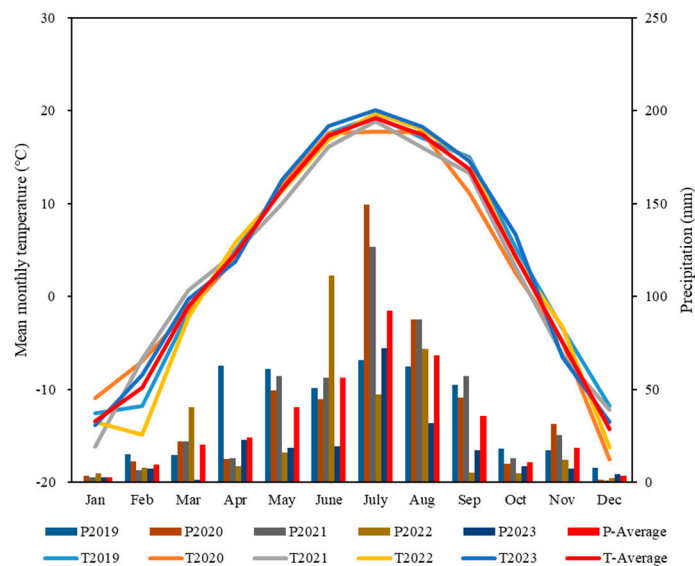

**Supplementary Figure S1.** Mean air temperature (°C) and monthly precipitation (mm) during 2019 to 2023.

**Supplementary Table S1.** The accuracy evaluation prediction results at three growth stages or the year 2023

| Stage                  | ML | R <sup>2</sup> | RMSE   | MAE    | MAPE | P_value |
|------------------------|----|----------------|--------|--------|------|---------|
| Heading Stage in 2023  | RF | 0.016          | 21.56  | 19.01  | 0.31 | >0.05   |
| Anthesis Stage in 2023 | RF | 0.027          | 109.59 | 84.41  | 0.56 | >0.05   |
| Milk Stage in 2023     | RF | 0.054          | 152.75 | 136.78 | 0.71 | >0.05   |

**Supplementary Table S2.** Using RF model to Predict seed yield for the year 2023

| Samples                                | 1    | 2    | 3    | 4    | 5    | 6    | 7    | 8    | 9    | 10   | 11   | 12   | 13   | 14   | 15   | 16   |
|----------------------------------------|------|------|------|------|------|------|------|------|------|------|------|------|------|------|------|------|
| Actual yield (kg ha <sup>-1</sup> )    | 24.1 | 30.2 | 57.1 | 27.3 | 29.7 | 57.7 | 34.8 | 47.7 | 46.6 | 46.5 | 45.3 | 42.9 | 53.0 | 48.2 | 45.9 | 45.9 |
| Predicted yield (kg ha <sup>-1</sup> ) | 63.2 | 61.1 | 61.7 | 61.4 | 62.4 | 61.9 | 61.4 | 61.0 | 61.6 | 61.5 | 61.4 | 60.7 | 62.9 | 61.1 | 61.9 | 62.2 |
